# Supplementary material for: Natural (∆9-THC) and synthetic (JWH-018) cannabinoids induce seizures by acting through the cannabinoid CB1 receptor
Source: Springer Nature journal article supplement (doi:10.1038/s41598-017-10447-2), 2017-08-30
Supplement: MOESM4 [file 41598_2017_10447_MOESM4_ESM-1.pdf]

**Title: Natural ( $\Delta^9$ -THC) and synthetic (JWH-018) cannabinoids induce seizures by acting through the cannabinoid CB<sub>1</sub> receptor.**

## **Authors**

Olga Malyshevskaya<sup>1\*</sup>, Kosuke Aritake<sup>1</sup>, Mahesh K. Kaushik<sup>1</sup>, Nahoko Uchiyama<sup>2</sup>, Yoan Cherasse<sup>1</sup>, Ruri Kikura-Hanajiri<sup>2</sup>, Yoshihiro Urade<sup>1</sup>

## **Supplementary Information**

**Suppl. Fig. 1. EEG and EMG traces after administration of cannabinoids. A.** At 4 h after  $\Delta^9$ -THC (10 mg/kg) administration. **B.** At 24 h after  $\Delta^9$ -THC (10 mg/kg) administration. **C.** At 4 h after JWH-018 (2.5 mg/kg) administration. **D.** At 24 h after JWH-018 (2.5 mg/kg) administration. EEG spikes are circled in the enlarged view. The analysed period in **B** and **D** includes the first hour of the dark phase of the following day.

**Suppl. Fig. 2.** EEG, EMG and LMA traces following administration of AM-251 (5 mg/kg).

**Video S1.** Seizure activity following i.p. administration of synthetic cannabinoid JWH-018.

**Video S2.** Behavioral reactions to i.p. administration of synthetic cannabinoid JWH-018.

**Video S3.** Behavioral reactions to, and seizure activity after, i.p. administration of  $\Delta^9$ -THC.

**Suppl. Table 1.** Behavioral events duration after  $\Delta^9$ -THC (10 mg/kg) or JWH-018 (2.5 mg/kg) administration. Events were quantified for a period of 1 h following i.p.; only

behavior with a score 2 and above (see Methods) were included in the analysis. (\*,  $p > 0.05$ , unpaired t-test)

**Suppl. Fig. 1**

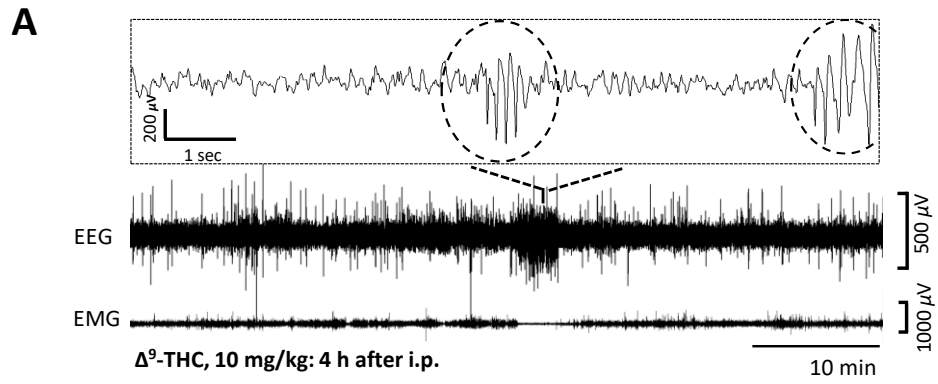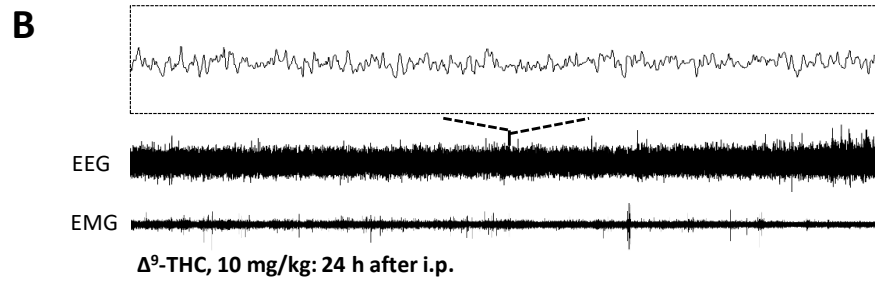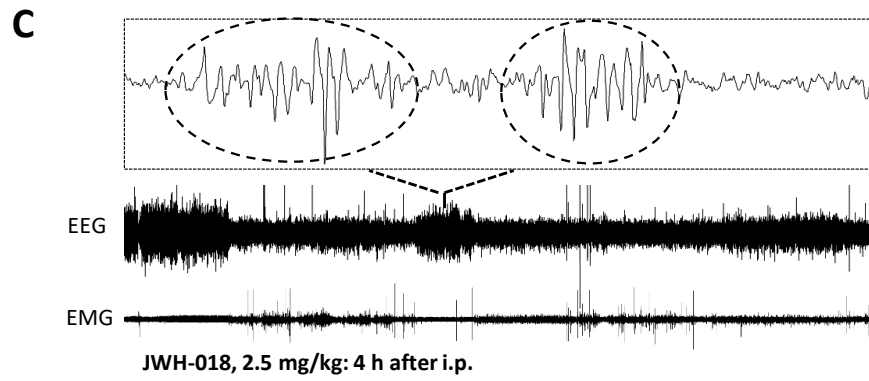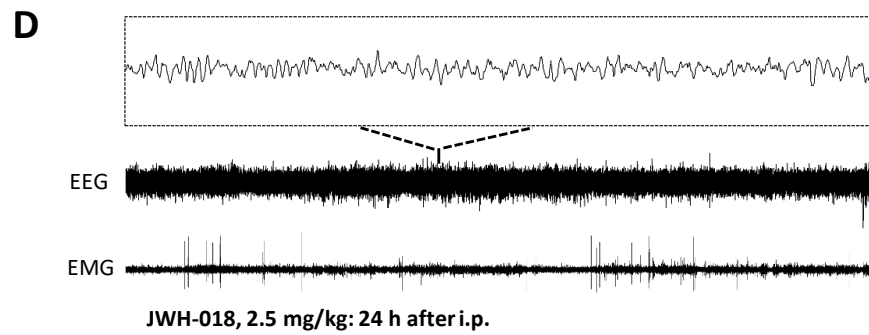

Suppl. Fig. 2

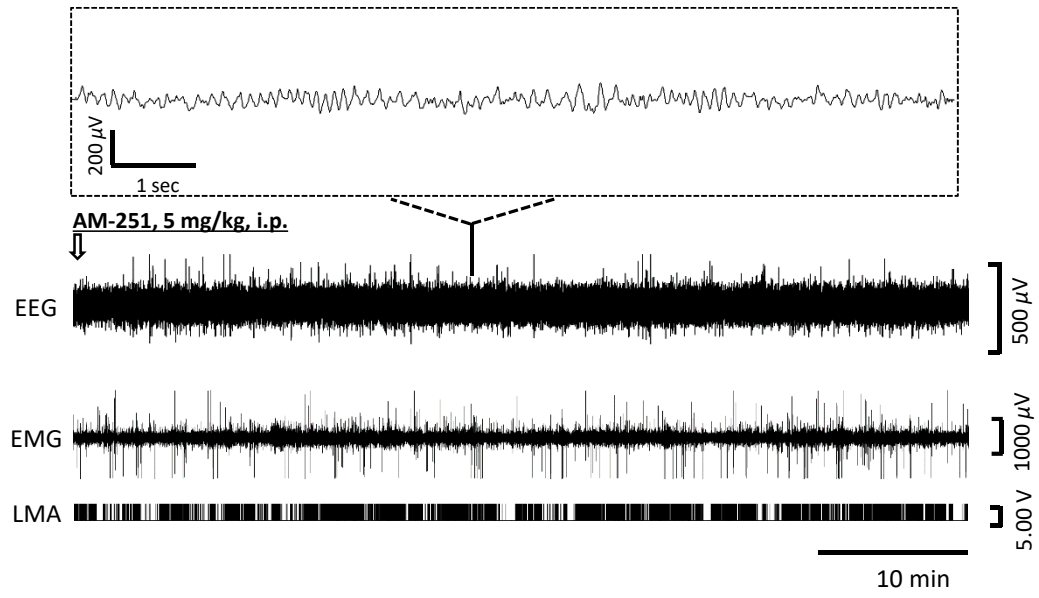

**Suppl. Table 1**

|                                |            | $\Delta 9$ -THC<br>(10 mg/kg) | JWH-018<br>(2.5 mg/kg) |
|--------------------------------|------------|-------------------------------|------------------------|
| <i>events/h</i>                |            |                               |                        |
| average number ( $\pm$ s.e.m.) |            |                               |                        |
| duration                       | 1-4<br>sec | 15.2 $\pm$ 4.3                | 34 $\pm$ 4.4*          |
|                                | 5-8<br>sec | 0                             | 6 $\pm$ 1*             |
|                                | Total      | 15.2 $\pm$ 4.3                | 40 $\pm$ 4.5*          |
